# Supplementary material
Source: PubMed Central journal article supplement (PMC7502284)
Supplement: mmc2.pdf [file mmc2.pdf]

# Supplementary Materials

## Mutations on designated COVID-19 diagnostic test reagents

Rui Wang<sup>1</sup>, Yuta Hozumi<sup>1</sup>, Changchuan Yin<sup>2</sup> \*, and Guo-Wei Wei<sup>1,3,4</sup> †

<sup>1</sup> Department of Mathematics, Michigan State University, MI 48824, USA

<sup>2</sup> Department of Mathematics, Statistics, and Computer Science,  
University of Illinois at Chicago, Chicago, IL 60607, USA

<sup>3</sup> Department of Biochemistry and Molecular Biology  
Michigan State University, MI 48824, USA

<sup>4</sup> Department of Electrical and Computer Engineering  
Michigan State University, MI 48824, USA

### Contents

|                                   |    |
|-----------------------------------|----|
| S1 Supplementary Tables           | 2  |
| S2 Additional supporting material | 19 |

---

\*Address correspondences to Changchuan Yin. E-mail:cyin1@uic.edu

†Address correspondences to Guo-Wei Wei. E-mail:wei@math.msu.edu

## S1 Supplementary Tables

Table S1: Designated COVID-19 diagnostic primers and probes.

| Primer/probe                         | Sequence                                     | Gene site              |
|--------------------------------------|----------------------------------------------|------------------------|
| RX7038-N1 primer (Fw) <sup>a</sup>   | GACCCCAAATCAGCGAAAT                          | 28287:28306            |
| RX7038-N1 primer (Rv) <sup>a</sup>   | TCTGGTACTGCCAGTTGAATCTG                      | 28335:28358            |
| RX7038-N2 primer (Fw) <sup>a</sup>   | TTACAAACATTGGCCGCAA                          | 29164:29183            |
| RX7038-N2 primer (Rv) <sup>a</sup>   | GCGCGACATTCCGAAGAA                           | 29213:29230            |
| RX7038-N3 primer (Fw) [1]            | 5'-GGGAGCCTTGAATACACCAAAA-3'                 | 28681:28702            |
| RX7038-N3 primer (Rv) [1]            | 5'-TGTAGCACGATTGCAGCATTG-3'                  | 28732:28752            |
| N1-U.S-P [2]                         | FAM-ACCCCGCATTACGTTT-G-BHQ1                  | 28309:28325            |
| N2-U.S-P [2]                         | FAM-ACAATTTGCCCCAGCGCTTCAG-BHQ1              | 29188:29210            |
| N3-U.S-P [2]                         | FAM-AYCACATTGGCACCCGCAATCCTG-BHQ-1           | 28704:28727 (Y:T)      |
| N-Sarbeco-F <sup>b</sup> [3]         | CACATTGGCACCCGCAATC                          | 28706:28724            |
| N-Sarbeco-P <sup>b</sup> [3]         | FAM-ACTTCCTCAAGGAACAACATTGCCA-BBQ            | 28753:28777            |
| N-Sarbeco-R <sup>b</sup> [3]         | GAGGAACGAGAAGAGGCTTG                         | 28814:28833            |
| N-China-F [2]                        | GGGGAACCTCTCTGCTAGAAT                        | 28881:28902            |
| N-China-R [2]                        | CAGACATTTTGCTCTCAAGCTG                       | 28958:28979            |
| N-China-P [2]                        | FAM-TTGCTGCTGCTTGACAGATT-TAMRA               | 28934:28953            |
| N-HK-F [2]                           | TAATCAGACAAGGAAGCTGATTA                      | 29145:29166            |
| N-HK-R [2]                           | CGAAGGTGTGACTTCCATG                          | 29236:29254            |
| N-JP-F [2]                           | AAATTTTGGGGACCAGGAAC                         | 29125:29144            |
| N-JP-P [2]                           | FAM-ATGTCGCGCATTGGCATGGA-BHQ                 | 29222:29241            |
| N-TL-F [2]                           | CGTTTGGTGGACCCTCAGAT                         | 28320:28339            |
| N-TL-R [2]                           | CCCCACTGCGTTCTCCATT                          | 28358:28376            |
| N-TL-P [2]                           | FAM-CAACTGGCAGTAACCA-BQH1                    | 28341:28356            |
| E-Sarbeco-F1 <sup>c</sup>            | ACAGGTACGTTAATAGTTAATAGCGT                   | 26269:26294            |
| E-Sarbeco-R2 <sup>c</sup>            | ATATTGCAGCAGTACGCACACA                       | 26360:26381            |
| E-Sarbeco-P1 <sup>c</sup>            | ACACTAGCCATCCTTACTGCGCTTCG [5']Fam [3']BHQ-1 | 26332:26357            |
| nCoV-IP2-12669Fw <sup>c</sup>        | ATGAGCTTAGTCCTGTGG                           | 12690:12707            |
| nCoV-IP2-12759Rv <sup>c</sup>        | CTCCCTTTGTTGTGTTGT                           | 12780:12797            |
| nCoV-IP2-12696bProbe(+) <sup>c</sup> | AGATGTCTTGTGCTGCCGGTA [5']Hex [3']BHQ-1      | 12717:12737            |
| nCoV-IP4-14059Fw <sup>c</sup>        | GGTAACTGGTATGATTTTCG                         | 14080:14098            |
| nCoV-IP4-14146Rv <sup>c</sup>        | CTGGTCAAGGTTAATATAGG                         | 14167:14186            |
| nCoV-IP4-14084Probe(+) <sup>c</sup>  | TCATACAAACCACGCCAGG [5']Fam [3']BHQ-1        | 14105:14123            |
| RdRP-SARSR-F2 <sup>d</sup>           | GTGARATGGTCATGTGTGGCGG                       | 15431:15452 (R:A)      |
| RdRP-SARSR-R1 <sup>d</sup> [3]       | CARATGTTAAASACACTATTAGCATA                   | 15505:15530 (R:A, S:A) |
| RdRP-SARSR-P2 <sup>d</sup> [3]       | FAM-CAGGTGGAACCTCATCAGGAGATGC- BBQ           | 15470:15494            |
| ORF1ab-China-F [2]                   | CCCTGTGGGTTTTACTACTTAA                       | 13342:13362            |
| ORF1ab-China-R [2]                   | ACGATTGTGCATCAGCTGA                          | 13442:13460            |
| ORF1ab-China-P [2]                   | FAM-CCGTCTGCGGTATGTGGAAAGGTTATGG-BHQ1        | 13377:13404            |
| ORF1b-nsp14-HK-F [2]                 | TGGGGYTTTACRGGTAACCT                         | 18778:18797 (Y:T, R:A) |
| ORF1b-nsp14-HK-R [2]                 | AACRCGCTTAACAAAGCACTC                        | 18889:18909 (R:A)      |
| ORF1b-nsp14-HK-P [2]                 | FAM-TAGTTGTGATGCWATCATGACTAG-TAMRA           | 18849:18872 (W:A)      |

Table S2: New Designated COVID-19 diagnostic primers and probes.

| Primer/probe                          | Sequence                  | Gene site   |
|---------------------------------------|---------------------------|-------------|
| SC2-F <sup>e</sup>                    | CTGCAGATTTGGATGATTTCTCC   | 29463:29485 |
| SC2-R <sup>e</sup>                    | CCTTGTGTGGTCTGCATGAGTTTAG | 29530:29554 |
| NIID_WH-1_F501 <sup>f</sup> [4]       | TTCGGATGCTCGAACTGCACC     | 484:504     |
| NIID_WH-1_R913 <sup>f</sup> [4]       | CTTTACCAGCACGTGCTAGAAGG   | 874:896     |
| NIID_WH-1_F509 <sup>f</sup> [4]       | CTCGAACTGCACCTCATGG       | 492:510     |
| NIID_WH-1_R854 <sup>f</sup> [4]       | CAGAAGTTGTTATCGACATAGC    | 816:837     |
| NIID_WH-1_Seq_F519 <sup>f</sup> [4]   | ACCTCATGGTCATGTTATGG      | 502:521     |
| NIID_WH-1_Seq_R840 <sup>f</sup> [4]   | GACATAGCGAGTGTATGCC       | 805: 823    |
| WuhanCoV-spk1-f <sup>f</sup> [4]      | TTGGCAAATTC AAGACTCACTTT  | 24354:24377 |
| WuhanCoV-spk1-r <sup>f</sup> [4]      | TGTGGTTCATAAAAATTCCTTTGTG | 24876:24900 |
| NIID_WH-1_F24381 <sup>f</sup> [4]     | TCAAGACTCACTTTCTTCCAC     | 24364:24384 |
| NIID_WH-1_R24873 <sup>f</sup> [4]     | ATTTGAAACAAAGACACCTTCAC   | 24834:24856 |
| NIID_WH-1_Seq_F24383 <sup>f</sup> [4] | AAGACTCACTTTCTTCCACAG     | 24366:24386 |
| NIID_WH-1_Seq_R24865 <sup>f</sup> [4] | CAAAGACACCTTCACGAGG       | 24830:24848 |

Table S3: Frequencies of single SNP genotypes in the RX7038-N1 primer (Fw)

| SNP position | Protein mutation | Total frequency | ClusterI | ClusterII | ClusterIII | ClusterIV | ClusterV | ClusterVI | Tm(°C) |
|--------------|------------------|-----------------|----------|-----------|------------|-----------|----------|-----------|--------|
| 28287G>T     | G5V              | 1               | 0        | 1         | 0          | 0         | 0        | 0         | 54.3   |
| 28289C>T     | P6S              | 3               | 0        | 0         | 0          | 2         | 0        | 1         | 53.3   |
| 28288A>G     | G5G              | 1               | 0        | 1         | 0          | 0         | 0        | 0         | 58.5   |
| 28305A>C     | N11T             | 2               | 0        | 2         | 0          | 0         | 0        | 0         | 57.8   |
| 28289C>A     | P6T              | 2               | 0        | 0         | 1          | 1         | 0        | 0         | 53.9   |
| 28302G>C     | R10P             | 3               | 1        | 0         | 0          | 2         | 0        | 0         | 55.9   |
| 28300G>C     | Q9H              | 1               | 0        | 0         | 0          | 1         | 0        | 0         | 56.1   |
| 28290C>T     | P6L              | 9               | 0        | 2         | 0          | 0         | 7        | 0         | 53.1   |
| 28305A>G     | N11S             | 4               | 0        | 0         | 4          | 0         | 0        | 0         | 57.8   |
| 28297T>C     | N8N              | 5               | 0        | 1         | 2          | 2         | 0        | 0         | 58.6   |
| 28293A>G     | Q7R              | 1               | 0        | 1         | 0          | 0         | 0        | 0         | 58.0   |
| 28294A>C     | Q7H              | 13              | 0        | 0         | 0          | 8         | 5        | 0         | 57.7   |
| 28300G>T     | Q9H              | 17              | 1        | 3         | 4          | 5         | 1        | 3         | 53.5   |
| 28291C>T     | P6P              | 6               | 1        | 1         | 0          | 4         | 0        | 0         | 53.1   |
| 28292C>A     | Q7K              | 11              | 2        | 2         | 1          | 3         | 1        | 2         | 53.9   |

Table S4: Frequencies of single SNP genotypes in the RX7038-N1 primer (Rv)

| SNP position | Protein mutation | Total frequency | ClusterI | ClusterII | ClusterIII | ClusterIV | ClusterV | ClusterVI | Tm(°C) |
|--------------|------------------|-----------------|----------|-----------|------------|-----------|----------|-----------|--------|
| 28340T>A     | S23T             | 1               | 0        | 0         | 0          | 1         | 0        | 0         | 60.5   |
| 28347G>T     | G25V             | 1               | 0        | 1         | 0          | 0         | 0        | 0         | 58.9   |
| 28357G>C     | Q28H             | 1               | 0        | 0         | 0          | 1         | 0        | 0         | 61.5   |
| 28355C>G     | Q28E             | 1               | 0        | 0         | 0          | 1         | 0        | 0         | 61.2   |
| 28356A>G     | Q28R             | 1               | 0        | 1         | 0          | 0         | 0        | 0         | 63.6   |
| 28347G>A     | G25D             | 1               | 0        | 0         | 1          | 0         | 0        | 0         | 58.9   |
| 28339T>A     | D22E             | 1               | 0        | 0         | 0          | 0         | 1        | 0         | 61.2   |
| 28346G>T     | G25C             | 3               | 0        | 0         | 0          | 1         | 0        | 2         | 59.4   |
| 28350G>T     | S26I             | 1               | 0        | 0         | 1          | 0         | 0        | 0         | 59.6   |
| 28337G>T     | D22Y             | 3               | 0        | 0         | 1          | 1         | 0        | 1         | 58.9   |
| 28349A>T     | S26C             | 1               | 0        | 0         | 0          | 0         | 1        | 0         | 61.2   |
| 28349A>G     | S26G             | 1               | 1        | 0         | 0          | 0         | 0        | 0         | 63.6   |
| 28337G>A     | D22N             | 1               | 0        | 0         | 0          | 1         | 0        | 0         | 60.0   |
| 28344C>A     | T24N             | 28              | 0        | 0         | 10         | 0         | 0        | 18        | 59.6   |
| 28354C>T     | N27N             | 3               | 0        | 0         | 0          | 3         | 0        | 0         | 58.9   |
| 28338A>G     | D22G             | 61              | 0        | 61        | 0          | 0         | 0        | 0         | 63.5   |
| 28344C>T     | T24I             | 4               | 0        | 3         | 1          | 0         | 0        | 0         | 59.6   |

Table S5: Frequencies of single SNP genotypes in the RX7038-N2 primer (Fw)

| SNP position | Protein mutation | Total frequency | ClusterI | ClusterII | ClusterIII | ClusterIV | ClusterV | ClusterVI | Tm(°C) |
|--------------|------------------|-----------------|----------|-----------|------------|-----------|----------|-----------|--------|
| 29177C>T     | P302S            | 1               | 0        | 0         | 0          | 1         | 0        | 0         | 53.0   |
| 29179G>A     | P302P            | 1               | 0        | 0         | 1          | 0         | 0        | 0         | 52.9   |
| 29173T>C     | H300H            | 1               | 0        | 1         | 0          | 0         | 0        | 0         | 57.3   |
| 29183A>G     | I304V            | 2               | 0        | 0         | 0          | 2         | 0        | 0         | 56.0   |
| 29179G>T     | P302P            | 33              | 3        | 1         | 21         | 7         | 0        | 1         | 52.5   |
| 29171C>T     | H300Y            | 21              | 0        | 8         | 2          | 10        | 1        | 0         | 52.5   |
| 29173T>G     | H300Q            | 1               | 0        | 0         | 0          | 1         | 0        | 0         | 57.3   |

Table S6: Frequencies of single SNP genotypes in the RX7038-N2 primer (Rv)

| SNP position | Protein mutation | Total frequency | ClusterI | ClusterII | ClusterIII | ClusterIV | ClusterV | ClusterVI | Tm(°C) |
|--------------|------------------|-----------------|----------|-----------|------------|-----------|----------|-----------|--------|
| 29230C>T     | R319R            | 1               | 0        | 1         | 0          | 0         | 0        | 0         | 56.8   |
| 29215C>T     | F314F            | 1               | 1        | 0         | 0          | 0         | 0        | 0         | 56.8   |
| 29229G>A     | R319H            | 4               | 0        | 0         | 0          | 3         | 0        | 1         | 55.5   |
| 29227G>T     | S318S            | 14              | 0        | 1         | 1          | 7         | 2        | 3         | 55.0   |
| 29227G>A     | S318S            | 6               | 0        | 1         | 0          | 2         | 0        | 3         | 55.5   |
| 29218C>T     | F315F            | 24              | 1        | 14        | 5          | 3         | 1        | 0         | 56.0   |

Table S7: Frequencies of single SNP genotypes in the RX7038-N3 primer (Fw)

| SNP position | Protein mutation | Total frequency | ClusterI | ClusterII | ClusterIII | ClusterIV | ClusterV | ClusterVI | Tm(°C) |
|--------------|------------------|-----------------|----------|-----------|------------|-----------|----------|-----------|--------|
| 28693T>G     | N140K            | 1               | 0        | 0         | 0          | 1         | 0        | 0         | 62.9   |
| 28696A>T     | T141T            | 1               | 0        | 1         | 0          | 0         | 0        | 0         | 60.0   |
| 28690G>A     | L139L            | 3               | 0        | 0         | 0          | 0         | 0        | 3         | 58.0   |
| 28697C>T     | P142S            | 4               | 1        | 2         | 0          | 0         | 1        | 0         | 57.9   |
| 28688T>G     | L139V            | 1               | 1        | 0         | 0          | 0         | 0        | 0         | 62.7   |
| 28692A>C     | N140T            | 9               | 0        | 1         | 0          | 2         | 4        | 2         | 62.2   |
| 28681G>A     | E136E            | 1               | 0        | 0         | 0          | 0         | 0        | 1         | 58.9   |
| 28685G>T     | A138S            | 4               | 0        | 0         | 4          | 0         | 0        | 0         | 58.1   |
| 28693T>C     | N140N            | 5               | 0        | 1         | 0          | 4         | 0        | 0         | 63.2   |
| 28687C>T     | A138A            | 10              | 0        | 2         | 8          | 0         | 0        | 0         | 58.4   |
| 28688T>C     | L139L            | 222             | 0        | 217       | 0          | 4         | 1        | 0         | 62.4   |
| 28695C>T     | T141I            | 6               | 2        | 0         | 0          | 4         | 0        | 0         | 57.4   |
| 28690G>T     | L139F            | 20              | 0        | 0         | 1          | 11        | 8        | 0         | 58.0   |

Table S8: Frequencies of single SNP genotypes in the RX7038-N3 primer (Rv)

| SNP position | Protein mutation | Total frequency | ClusterI | ClusterII | ClusterIII | ClusterIV | ClusterV | ClusterVI | Tm(°C) |
|--------------|------------------|-----------------|----------|-----------|------------|-----------|----------|-----------|--------|
| 28743T>C     | I157T            | 1               | 0        | 1         | 0          | 0         | 0        | 0         | 62.2   |
| 28752A>C     | Q160P            | 1               | 0        | 1         | 0          | 0         | 0        | 0         | 60.8   |
| 28733A>T     | N154Y            | 2               | 1        | 0         | 0          | 1         | 0        | 0         | 58.6   |
| 28741A>T     | A156A            | 1               | 1        | 0         | 0          | 0         | 0        | 0         | 58.6   |
| 28750A>G     | L159L            | 1               | 0        | 0         | 0          | 0         | 0        | 1         | 62.5   |
| 28738T>G     | A155A            | 1               | 0        | 0         | 1          | 0         | 0        | 0         | 62.3   |
| 28737C>T     | A155V            | 13              | 2        | 0         | 0          | 11        | 0        | 0         | 58.0   |
| 28739G>T     | A156S            | 24              | 0        | 1         | 3          | 13        | 6        | 1         | 57.6   |
| 28741A>G     | A156A            | 1               | 0        | 1         | 0          | 0         | 0        | 0         | 61.6   |
| 28747G>T     | V158V            | 8               | 0        | 2         | 0          | 6         | 0        | 0         | 57.6   |
| 28748C>T     | L159L            | 4               | 0        | 1         | 2          | 1         | 0        | 0         | 58.0   |
| 28744C>T     | I157I            | 13              | 0        | 3         | 1          | 7         | 0        | 2         | 57.8   |

Table S9: Frequencies of single SNP genotypes in the N1-U.S-P

| SNP position | Protein mutation | Total frequency | ClusterI | ClusterII | ClusterIII | ClusterIV | ClusterV | ClusterVI | Tm(°C) |
|--------------|------------------|-----------------|----------|-----------|------------|-----------|----------|-----------|--------|
| 28314G>A     | R14H             | 1               | 1        | 0         | 0          | 0         | 0        | 0         | 52.2   |
| 28310C>A     | P13T             | 3               | 0        | 2         | 0          | 1         | 0        | 0         | 53.0   |
| 28311C>G     | P13R             | 4               | 0        | 4         | 0          | 0         | 0        | 0         | 55.6   |
| 28318T>C     | I15I             | 2               | 0        | 0         | 2          | 0         | 0        | 0         | 58.3   |
| 28325G>T     | G18C             | 16              | 0        | 0         | 1          | 7         | 8        | 0         | 54.3   |
| 28321G>A     | T16T             | 5               | 0        | 3         | 0          | 1         | 0        | 1         | 52.2   |
| 28313C>G     | R14G             | 1               | 0        | 0         | 0          | 0         | 1        | 0         | 55.3   |
| 28315C>T     | R14R             | 2               | 0        | 2         | 0          | 0         | 0        | 0         | 51.7   |
| 28320C>T     | T16M             | 7               | 0        | 0         | 6          | 1         | 0        | 0         | 52.2   |
| 28321G>T     | T16T             | 10              | 1        | 0         | 1          | 8         | 0        | 0         | 52.4   |
| 28310C>T     | P13S             | 12              | 2        | 0         | 0          | 6         | 3        | 1         | 52.3   |
| 28313C>T     | R14C             | 3               | 0        | 1         | 2          | 0         | 0        | 0         | 52.0   |
| 28312C>T     | P13P             | 10              | 0        | 4         | 2          | 3         | 0        | 1         | 52.2   |
| 28314G>T     | R14L             | 3               | 0        | 0         | 1          | 2         | 0        | 0         | 51.7   |
| 28311C>T     | P13L             | 777             | 0        | 766       | 5          | 2         | 3        | 1         | 52.2   |

Table S10: Frequencies of single SNP genotypes in the N2-U.S-P

| SNP position | Protein mutation | Total frequency | ClusterI | ClusterII | ClusterIII | ClusterIV | ClusterV | ClusterVI | Tm(°C) |
|--------------|------------------|-----------------|----------|-----------|------------|-----------|----------|-----------|--------|
| 29206T>C     | A311A            | 1               | 1        | 0         | 0          | 0         | 0        | 0         | 68.8   |
| 29203C>T     | S310S            | 7               | 7        | 0         | 0          | 0         | 0        | 0         | 64.7   |
| 29199C>T     | P309L            | 2               | 0        | 1         | 0          | 1         | 0        | 0         | 64.3   |
| 29194T>C     | F307F            | 3               | 0        | 0         | 0          | 3         | 0        | 0         | 68.6   |
| 29202G>T     | S310I            | 2               | 1        | 0         | 0          | 1         | 0        | 0         | 64.8   |
| 29201A>T     | S310C            | 1               | 0        | 0         | 0          | 1         | 0        | 0         | 66.8   |
| 29202G>A     | S310N            | 2               | 0        | 0         | 2          | 0         | 0        | 0         | 65.1   |
| 29197C>T     | A308A            | 3               | 0        | 0         | 1          | 0         | 2        | 0         | 64.3   |
| 29195G>T     | A308S            | 6               | 1        | 1         | 0          | 4         | 0        | 0         | 64.8   |
| 29205C>T     | A311V            | 2               | 0        | 0         | 0          | 2         | 0        | 0         | 65.1   |
| 29188A>T     | A305A            | 41              | 0        | 38        | 1          | 0         | 2        | 0         | 66.9   |

Table S11: Frequencies of single SNP genotypes in the N3-U.S-P

| SNP position | Protein mutation | Total frequency | ClusterI | ClusterII | ClusterIII | ClusterIV | ClusterV | ClusterVI | Tm(°C) |
|--------------|------------------|-----------------|----------|-----------|------------|-----------|----------|-----------|--------|
| 28716C>T     | T148I            | 1               | 0        | 1         | 0          | 0         | 0        | 0         | 64.0   |
| 28709A>T     | I146F            | 2               | 0        | 2         | 0          | 0         | 0        | 0         | 66.4   |
| 28705T>G     | D144E            | 1               | 0        | 1         | 0          | 0         | 0        | 0         | 68.2   |
| 28723T>C     | N150N            | 2               | 0        | 0         | 1          | 0         | 1        | 0         | 68.5   |
| 28708C>G     | H145Q            | 4               | 0        | 0         | 3          | 0         | 0        | 1         | 66.0   |
| 28705T>C     | D144D            | 3               | 0        | 3         | 0          | 0         | 0        | 0         | 68.5   |
| 28717C>T     | T148T            | 2               | 0        | 1         | 0          | 1         | 0        | 0         | 63.8   |
| 28706C>A     | H145N            | 1               | 0        | 0         | 0          | 1         | 0        | 0         | 64.0   |
| 28724C>T     | P151S            | 3               | 0        | 0         | 2          | 0         | 1        | 0         | 64.4   |
| 28714C>T     | G147G            | 2               | 0        | 0         | 0          | 1         | 0        | 1         | 63.7   |
| 28720C>T     | R149R            | 11              | 0        | 0         | 3          | 5         | 1        | 2         | 63.7   |
| 28706C>T     | H145Y            | 5               | 1        | 2         | 0          | 0         | 2        | 0         | 64.0   |
| 28727G>T     | A152S            | 13              | 0        | 2         | 3          | 6         | 0        | 2         | 65.4   |
| 28712G>A     | G147S            | 3               | 1        | 1         | 0          | 1         | 0        | 0         | 63.5   |
| 28725C>T     | P151L            | 4               | 1        | 1         | 2          | 0         | 0        | 0         | 64.4   |
| 28708C>T     | H145H            | 27              | 2        | 13        | 1          | 6         | 5        | 0         | 63.7   |

Table S12: Frequencies of single SNP genotypes in the N-Sarbeco-F

| SNP position | Protein mutation | Total frequency | ClusterI | ClusterII | ClusterIII | ClusterIV | ClusterV | ClusterVI | Tm(°C) |
|--------------|------------------|-----------------|----------|-----------|------------|-----------|----------|-----------|--------|
| 28716C>T     | T148I            | 1               | 0        | 1         | 0          | 0         | 0        | 0         | 56.6   |
| 28709A>T     | I146F            | 2               | 0        | 2         | 0          | 0         | 0        | 0         | 59.5   |
| 28723T>C     | N150N            | 2               | 0        | 0         | 1          | 0         | 1        | 0         | 62.1   |
| 28708C>G     | H145Q            | 4               | 0        | 0         | 3          | 0         | 0        | 1         | 59.0   |
| 28717C>T     | T148T            | 2               | 0        | 1         | 0          | 1         | 0        | 0         | 56.4   |
| 28706C>A     | H145N            | 1               | 0        | 0         | 0          | 1         | 0        | 0         | 58.4   |
| 28724C>T     | P151S            | 3               | 0        | 0         | 2          | 0         | 1        | 0         | 58.5   |
| 28714C>T     | G147G            | 2               | 0        | 0         | 0          | 1         | 0        | 1         | 56.1   |
| 28720C>T     | R149R            | 11              | 0        | 0         | 3          | 5         | 1        | 2         | 56.1   |
| 28706C>T     | H145Y            | 5               | 1        | 2         | 0          | 0         | 2        | 0         | 57.6   |
| 28712G>A     | G147S            | 3               | 1        | 1         | 0          | 1         | 0        | 0         | 55.9   |
| 28708C>T     | H145H            | 27              | 2        | 13        | 1          | 6         | 5        | 0         | 56.1   |

Table S13: Frequencies of single SNP genotypes in the N-Sarbeco-P

| SNP position | Protein mutation | Total frequency | ClusterI | ClusterII | ClusterIII | ClusterIV | ClusterV | ClusterVI | Tm(°C) |
|--------------|------------------|-----------------|----------|-----------|------------|-----------|----------|-----------|--------|
| 28776C>A     | P168Q            | 1               | 0        | 0         | 0          | 1         | 0        | 0         | 61.5   |
| 28761A>G     | Q163R            | 1               | 0        | 1         | 0          | 0         | 0        | 0         | 65.0   |
| 28757C>T     | P162S            | 2               | 0        | 0         | 0          | 0         | 0        | 2         | 61.5   |
| 28768A>T     | T165T            | 1               | 0        | 0         | 0          | 1         | 0        | 0         | 62.4   |
| 28754C>T     | L161F            | 9               | 0        | 0         | 3          | 0         | 0        | 6         | 61.7   |
| 28758C>A     | P162H            | 1               | 0        | 0         | 0          | 0         | 0        | 1         | 61.5   |
| 28774G>T     | L167F            | 2               | 0        | 0         | 2          | 0         | 0        | 0         | 61.4   |
| 28770C>T     | T166I            | 5               | 0        | 1         | 0          | 4         | 0        | 0         | 60.8   |
| 28759T>C     | P162P            | 23              | 0        | 1         | 22         | 0         | 0        | 0         | 65.7   |
| 28765A>G     | G164G            | 30              | 0        | 0         | 1          | 15        | 14       | 0         | 65.1   |
| 28775C>T     | P168S            | 26              | 1        | 1         | 2          | 21        | 1        | 0         | 61.2   |
| 28758C>T     | P162L            | 15              | 0        | 15        | 0          | 0         | 0        | 0         | 61.5   |

Table S14: Frequencies of single SNP genotypes in the N-Sarbeco-R

| SNP position | Protein mutation | Total frequency | ClusterI | ClusterII | ClusterIII | ClusterIV | ClusterV | ClusterVI | Tm(°C) |
|--------------|------------------|-----------------|----------|-----------|------------|-----------|----------|-----------|--------|
| 28818C>T     | A182V            | 1               | 0        | 0         | 0          | 1         | 0        | 0         | 55.1   |
| 28817G>A     | A182T            | 1               | 0        | 0         | 0          | 1         | 0        | 0         | 55.9   |
| 28820T>A     | S183T            | 1               | 0        | 0         | 0          | 1         | 0        | 0         | 58.2   |
| 28823T>C     | S184P            | 1               | 1        | 0         | 0          | 0         | 0        | 0         | 60.0   |
| 28819C>T     | A182A            | 1               | 1        | 0         | 0          | 0         | 0        | 0         | 55.7   |
| 28829T>C     | S186P            | 2               | 0        | 2         | 0          | 0         | 0        | 0         | 60.0   |
| 28831C>T     | S186S            | 1               | 0        | 0         | 0          | 1         | 0        | 0         | 55.7   |
| 28819C>A     | A182A            | 1               | 0        | 1         | 0          | 0         | 0        | 0         | 55.5   |
| 28830C>T     | S186F            | 5               | 0        | 5         | 0          | 0         | 0        | 0         | 55.7   |
| 28827G>A     | R185H            | 2               | 0        | 1         | 0          | 0         | 1        | 0         | 55.1   |
| 28817G>T     | A182S            | 16              | 0        | 0         | 2          | 14        | 0        | 0         | 55.3   |
| 28827G>T     | R185L            | 9               | 3        | 0         | 0          | 6         | 0        | 0         | 55.2   |
| 28827G>C     | R185P            | 1               | 0        | 0         | 0          | 0         | 0        | 1         | 57.4   |
| 28833C>T     | S187L            | 17              | 3        | 4         | 0          | 8         | 1        | 1         | 56.9   |
| 28828T>C     | R185R            | 1               | 0        | 0         | 1          | 0         | 0        | 0         | 59.8   |
| 28821C>A     | S183Y            | 69              | 27       | 0         | 0          | 42        | 0        | 0         | 55.0   |
| 28826C>T     | R185C            | 27              | 2        | 13        | 1          | 6         | 3        | 2         | 55.6   |

Table S15: Frequencies of single SNP genotypes in the N-China-F

| SNP position | Protein mutation | Total frequency | ClusterI | ClusterII | ClusterIII | ClusterIV | ClusterV | ClusterVI | Tm(°C) |
|--------------|------------------|-----------------|----------|-----------|------------|-----------|----------|-----------|--------|
| 28885A>G     | G204G            | 1               | 0        | 1         | 0          | 0         | 0        | 0         | 63.1   |
| 28902T>C     | M210T            | 2               | 0        | 0         | 0          | 0         | 2        | 0         | 62.3   |
| 28888T>A     | T205T            | 1               | 0        | 1         | 0          | 0         | 0        | 0         | 60.8   |
| 28889T>C     | S206P            | 1               | 0        | 0         | 0          | 1         | 0        | 0         | 63.1   |
| 28894T>C     | P207P            | 1               | 0        | 0         | 0          | 0         | 0        | 1         | 63.6   |
| 28890C>G     | S206C            | 1               | 0        | 1         | 0          | 0         | 0        | 0         | 61.3   |
| 28893C>T     | P207L            | 15              | 0        | 0         | 0          | 15        | 0        | 0         | 58.9   |
| 28899G>C     | R209T            | 28              | 17       | 1         | 1          | 9         | 0        | 0         | 61.3   |
| 28895G>T     | A208S            | 1               | 0        | 0         | 0          | 0         | 0        | 1         | 58.7   |
| 28900A>C     | R209S            | 1               | 0        | 0         | 0          | 1         | 0        | 0         | 63.1   |
| 28899G>A     | R209K            | 7               | 4        | 2         | 0          | 1         | 0        | 0         | 59.6   |
| 28888T>C     | T205T            | 4               | 0        | 0         | 3          | 0         | 0        | 1         | 63.1   |
| 28892C>T     | P207S            | 5               | 2        | 0         | 2          | 1         | 0        | 0         | 58.9   |
| 28883G>A     | G204R            | 3               | 0        | 0         | 1          | 2         | 0        | 0         | 58.2   |
| 28884G>C     | G204A            | 1               | 0        | 0         | 1          | 0         | 0        | 0         | 61.1   |
| 28896C>G     | A208G            | 52              | 0        | 51        | 1          | 0         | 0        | 0         | 61.2   |
| 28881G>T     | R203M            | 13              | 3        | 1         | 0          | 6         | 3        | 0         | 59.8   |
| 28882G>T     | R203S            | 12              | 7        | 1         | 0          | 2         | 2        | 0         | 58.6   |
| 28887C>T     | T205I            | 95              | 5        | 54        | 7          | 11        | 8        | 10        | 59.1   |
| 28890C>T     | S206F            | 45              | 0        | 0         | 44         | 1         | 0        | 0         | 59.6   |
| 28881G>A     | R203K            | 8672            | 0        | 41        | 3604       | 35        | 1        | 4991      | 59.4   |
| 28882G>A     | R203R            | 8660            | 0        | 36        | 3605       | 27        | 0        | 4992      | 58.2   |
| 28883G>C     | G204R            | 8659            | 0        | 36        | 3604       | 27        | 1        | 4991      | 61.0   |

Table S16: Frequencies of single SNP genotypes in the N-China-R

| SNP position | Protein mutation | Total frequency | ClusterI | ClusterII | ClusterIII | ClusterIV | ClusterV | ClusterVI | Tm(°C) |
|--------------|------------------|-----------------|----------|-----------|------------|-----------|----------|-----------|--------|
| 28976T>C     | S235P            | 1               | 0        | 1         | 0          | 0         | 0        | 0         | 60.9   |
| 28975G>A     | M234I            | 1               | 0        | 0         | 0          | 0         | 0        | 1         | 55.6   |
| 28969C>A     | S232R            | 1               | 1        | 0         | 0          | 0         | 0        | 0         | 56.4   |
| 28978T>A     | S235S            | 2               | 0        | 0         | 0          | 0         | 0        | 2         | 58.5   |
| 28968G>C     | S232T            | 2               | 0        | 0         | 0          | 0         | 2        | 0         | 58.7   |
| 28975G>C     | M234I            | 1               | 0        | 0         | 0          | 0         | 1        | 0         | 58.1   |
| 28966G>A     | E231E            | 2               | 0        | 2         | 0          | 0         | 0        | 0         | 57.3   |
| 28969C>T     | S232S            | 5               | 0        | 0         | 0          | 3         | 2        | 0         | 55.6   |
| 28973A>T     | M234L            | 2               | 0        | 2         | 0          | 0         | 0        | 0         | 58.5   |
| 28979G>T     | G236C            | 3               | 0        | 1         | 2          | 0         | 0        | 0         | 57.7   |
| 28961C>T     | L230F            | 5               | 0        | 2         | 2          | 1         | 0        | 0         | 56.8   |
| 28968G>T     | S232I            | 10              | 1        | 0         | 1          | 7         | 1        | 0         | 56.3   |
| 28975G>T     | M234I            | 23              | 2        | 6         | 0          | 10        | 2        | 3         | 56.9   |
| 28960G>T     | Q229H            | 19              | 0        | 1         | 8          | 1         | 0        | 9         | 56.3   |
| 28979G>A     | G236S            | 2               | 0        | 0         | 2          | 0         | 0        | 0         | 57.0   |
| 28977C>T     | S235F            | 136             | 1        | 0         | 0          | 135       | 0        | 0         | 57.3   |
| 28963T>G     | L230L            | 2               | 0        | 0         | 2          | 0         | 0        | 0         | 60.5   |



Table S17: Frequencies of single SNP genotypes in the N-China-P

| SNP position | Protein mutation | Total frequency | ClusterI | ClusterII | ClusterIII | ClusterIV | ClusterV | ClusterVI | Tm(°C) |
|--------------|------------------|-----------------|----------|-----------|------------|-----------|----------|-----------|--------|
| 28937C>T     | L222L            | 1               | 0        | 0         | 1          | 0         | 0        | 0         | 54.1   |
| 28952T>C     | L227L            | 1               | 1        | 0         | 0          | 0         | 0        | 0         | 57.8   |
| 28940C>T     | L223L            | 4               | 0        | 0         | 4          | 0         | 0        | 0         | 54.1   |
| 28948C>T     | D225D            | 11              | 0        | 3         | 1          | 6         | 1        | 0         | 52.8   |
| 28946G>T     | D225Y            | 1               | 0        | 1         | 0          | 0         | 0        | 0         | 53.4   |
| 28936G>A     | L221L            | 1               | 0        | 0         | 0          | 1         | 0        | 0         | 52.8   |
| 28951A>G     | R226R            | 1               | 0        | 0         | 0          | 1         | 0        | 0         | 58.5   |

Table S18: Frequencies of single SNP genotypes in the N-HK-F

| SNP position | Protein mutation | Total frequency | ClusterI | ClusterII | ClusterIII | ClusterIV | ClusterV | ClusterVI | Tm(°C) |
|--------------|------------------|-----------------|----------|-----------|------------|-----------|----------|-----------|--------|
| 29160C>T     | T296I            | 2               | 0        | 0         | 1          | 1         | 0        | 0         | 51.4   |
| 29147A>G     | I292V            | 1               | 0        | 0         | 0          | 1         | 0        | 0         | 55.0   |
| 29149C>T     | I292I            | 6               | 1        | 2         | 1          | 1         | 0        | 1         | 50.8   |
| 29148T>C     | I292T            | 138             | 0        | 0         | 72         | 2         | 1        | 63        | 55.7   |
| 29153C>A     | Q294K            | 2               | 0        | 0         | 0          | 2         | 0        | 0         | 51.6   |

Table S19: Frequencies of single SNP genotypes in the N-HK-R

| SNP position | Protein mutation | Total frequency | Cluster I | Cluster II | Cluster III | Cluster IV | Cluster V | Tm(°C) |      |
|--------------|------------------|-----------------|-----------|------------|-------------|------------|-----------|--------|------|
| 29244T>C     | V324A            | 1               | 0         | 0          | 0           | 1          | 0         | 58.7   |      |
| 29242A>G     | E323E            | 2               | 0         | 0          | 2           | 0          | 0         | 58.2   |      |
| 29236C>T     | G321G            | 2               | 0         | 0          | 0           | 2          | 0         | 54.0   |      |
| 29249C>T     | P326S            | 3               | 0         | 0          | 2           | 1          | 0         | 53.0   |      |
| 29250C>T     | P326L            | 5               | 0         | 2          | 1           | 2          | 0         | 53.7   |      |
| 29253C>T     | S327L            | 17              | 5         | 1          | 2           | 8          | 0         | 53.6   |      |
| 29243G>T     | V324F            | 1               | 0         | 0          | 1           | 0          | 0         | 53.8   |      |
| 29236C>A     | G321G            | 2               | 0         | 0          | 0           | 2          | 0         | 54.9   |      |
| 29240G>A     | E323K            | 1               | 0         | 1          | 0           | 0          | 0         | 53.7   |      |
| 29243G>A     | V324I            | 6               | 0         | 0          | 0           | 3          | 3         | 53.8   |      |
| 29245C>T     | V324V            | 1               | 1         | 0          | 0           | 0          | 0         | 53.1   |      |
| 29247C>T     | T325I            | 10              | 5         | 0          | 0           | 5          | 0         | 52.5   |      |
| 29254G>T     | S327S            | 27              | 3         | 5          | 5           | 9          | 1         | 4      | 54.0 |
| 29254G>A     | S327S            | 6               | 0         | 3          | 1           | 2          | 0         | 0      | 54.5 |

Table S20: Frequencies of single SNP genotypes in the N-JP-F

| SNP position | Protein mutation | Total frequency | ClusterI | ClusterII | ClusterIII | ClusterIV | ClusterV | ClusterVI | Tm(°C) |
|--------------|------------------|-----------------|----------|-----------|------------|-----------|----------|-----------|--------|
| 29140G>C     | Q289H            | 1               | 0        | 1         | 0          | 0         | 0        | 0         | 56.7   |
| 29143A>C     | E290D            | 3               | 0        | 0         | 0          | 1         | 2        | 0         | 58.5   |
| 29139A>T     | Q289L            | 1               | 0        | 0         | 0          | 1         | 0        | 0         | 56.2   |
| 29138C>A     | Q289K            | 1               | 0        | 0         | 1          | 0         | 0        | 0         | 54.1   |
| 29134G>A     | G287G            | 3               | 0        | 1         | 0          | 2         | 0        | 0         | 53.4   |
| 29139A>G     | Q289R            | 1               | 1        | 0         | 0          | 0         | 0        | 0         | 59.1   |
| 29125A>G     | G284G            | 1               | 0        | 0         | 0          | 1         | 0        | 0         | 57.2   |
| 29128T>C     | N285N            | 2               | 2        | 0         | 0          | 0         | 0        | 0         | 58.2   |
| 29140G>T     | Q289H            | 11              | 2        | 6         | 0          | 2         | 1        | 0         | 54.0   |
| 29144C>T     | L291L            | 42              | 0        | 2         | 8          | 9         | 23       | 0         | 54.8   |

Table S21: Frequencies of single SNP genotypes in the N-JP-P

| SNP position | Protein mutation | Total frequency | ClusterI | ClusterII | ClusterIII | ClusterIV | ClusterV | ClusterVI | Tm(°C) |
|--------------|------------------|-----------------|----------|-----------|------------|-----------|----------|-----------|--------|
| 29230C>T     | R319R            | 1               | 0        | 1         | 0          | 0         | 0        | 0         | 58.2   |
| 29234G>C     | G321R            | 1               | 0        | 0         | 0          | 0         | 1        | 0         | 61.1   |
| 29231A>G     | I320V            | 1               | 0        | 1         | 0          | 0         | 0        | 0         | 63.6   |
| 29236C>T     | G321G            | 2               | 0        | 0         | 0          | 2         | 0        | 0         | 58.2   |
| 29229G>A     | R319H            | 4               | 0        | 0         | 0          | 3         | 0        | 1         | 58.7   |
| 29236C>A     | G321G            | 2               | 0        | 0         | 0          | 2         | 0        | 0         | 59.0   |
| 29240G>A     | E323K            | 1               | 0        | 1         | 0          | 0         | 0        | 0         | 59.1   |
| 29227G>T     | S318S            | 14              | 0        | 1         | 1          | 7         | 2        | 3         | 58.4   |
| 29227G>A     | S318S            | 6               | 0        | 1         | 0          | 2         | 0        | 3         | 58.7   |

Table S22: Frequencies of single SNP genotypes in the N-TL-F

| SNP position | Protein mutation | Total frequency | ClusterI | ClusterII | ClusterIII | ClusterIV | ClusterV | ClusterVI | Tm(°C) |
|--------------|------------------|-----------------|----------|-----------|------------|-----------|----------|-----------|--------|
| 28328G>C     | G19R             | 1               | 0        | 1         | 0          | 0         | 0        | 0         | 59.6   |
| 28330A>G     | G19G             | 1               | 0        | 1         | 0          | 0         | 0        | 0         | 62.4   |
| 28339T>A     | D22E             | 1               | 0        | 0         | 0          | 0         | 1        | 0         | 60.2   |
| 28331C>T     | P20S             | 8               | 0        | 4         | 3          | 0         | 0        | 1         | 56.9   |
| 28337G>T     | D22Y             | 3               | 0        | 0         | 1          | 1         | 0        | 1         | 56.8   |
| 28337G>A     | D22N             | 1               | 0        | 0         | 0          | 1         | 0        | 0         | 58.2   |
| 28325G>T     | G18C             | 16              | 0        | 0         | 1          | 7         | 8        | 0         | 57.4   |
| 28321G>A     | T16T             | 5               | 0        | 3         | 0          | 1         | 0        | 1         | 56.9   |
| 28326G>C     | G18A             | 1               | 0        | 1         | 0          | 0         | 0        | 0         | 59.4   |
| 28329G>T     | G19V             | 4               | 0        | 0         | 0          | 1         | 3        | 0         | 56.6   |
| 28332C>T     | P20L             | 10              | 0        | 1         | 0          | 8         | 1        | 0         | 56.7   |
| 28328G>A     | G19R             | 3               | 0        | 1         | 0          | 2         | 0        | 0         | 56.2   |
| 28329G>A     | G19E             | 4               | 0        | 0         | 1          | 0         | 0        | 3         | 57.4   |
| 28320C>T     | T16M             | 7               | 0        | 0         | 6          | 1         | 0        | 0         | 58.4   |
| 28321G>T     | T16T             | 10              | 1        | 0         | 1          | 8         | 0        | 0         | 57.0   |
| 28338A>G     | D22G             | 61              | 0        | 61        | 0          | 0         | 0        | 0         | 62.4   |
| 28326G>T     | G18V             | 13              | 0        | 11        | 1          | 1         | 0        | 0         | 57.4   |

Table S23: Frequencies of single SNP genotypes in the N-TL-R

| SNP position | Protein mutation | Total frequency | ClusterI | ClusterII | ClusterIII | ClusterIV | ClusterV | ClusterVI | Tm(°C) |
|--------------|------------------|-----------------|----------|-----------|------------|-----------|----------|-----------|--------|
| 28376G>A     | A35T             | 1               | 0        | 1         | 0          | 0         | 0        | 0         | 58.6   |
| 28371G>A     | S33N             | 1               | 0        | 1         | 0          | 0         | 0        | 0         | 57.9   |
| 28363A>G     | G30G             | 1               | 0        | 0         | 1          | 0         | 0        | 0         | 63.1   |
| 28370A>G     | S33G             | 1               | 0        | 0         | 0          | 1         | 0        | 0         | 63.0   |
| 28361G>C     | G30R             | 2               | 0        | 0         | 0          | 2         | 0        | 0         | 59.9   |
| 28376G>T     | A35S             | 30              | 3        | 0         | 0          | 27        | 0        | 0         | 58.6   |
| 28362G>C     | G30A             | 1               | 0        | 1         | 0          | 0         | 0        | 0         | 60.1   |
| 28359A>G     | N29S             | 2               | 1        | 0         | 0          | 1         | 0        | 0         | 62.1   |
| 28368G>T     | R32L             | 1               | 0        | 1         | 0          | 0         | 0        | 0         | 56.7   |
| 28360T>A     | N29K             | 1               | 0        | 0         | 1          | 0         | 0        | 0         | 60.1   |
| 28367C>T     | R32C             | 2               | 0        | 0         | 0          | 2         | 0        | 0         | 57.1   |
| 28364G>C     | E31Q             | 1               | 0        | 0         | 0          | 1         | 0        | 0         | 60.4   |
| 28368G>A     | R32H             | 24              | 17       | 0         | 0          | 6         | 1        | 0         | 57.1   |
| 28372T>C     | S33S             | 1               | 0        | 0         | 0          | 1         | 0        | 0         | 62.6   |
| 28363A>C     | G30G             | 1               | 0        | 1         | 0          | 0         | 0        | 0         | 63.0   |
| 28373G>T     | G34W             | 13              | 1        | 2         | 2          | 4         | 2        | 2         | 57.7   |
| 28371G>T     | S33I             | 32              | 7        | 0         | 3          | 21        | 0        | 1         | 57.9   |

Table S24: Frequencies of single SNP genotypes in the N-TL-P

| SNP position | Protein mutation | Total frequency | ClusterI | ClusterII | ClusterIII | ClusterIV | ClusterV | ClusterVI | Tm(°C) |
|--------------|------------------|-----------------|----------|-----------|------------|-----------|----------|-----------|--------|
| 28347G>T     | G25V             | 1               | 0        | 1         | 0          | 0         | 0        | 0         | 47.7   |
| 28355C>G     | Q28E             | 1               | 0        | 0         | 0          | 1         | 0        | 0         | 51.2   |
| 28356A>G     | Q28R             | 1               | 0        | 1         | 0          | 0         | 0        | 0         | 52.6   |
| 28347G>A     | G25D             | 1               | 0        | 0         | 1          | 0         | 0        | 0         | 47.7   |
| 28346G>T     | G25C             | 3               | 0        | 0         | 0          | 1         | 0        | 2         | 48.5   |
| 28350G>T     | S26I             | 1               | 0        | 0         | 1          | 0         | 0        | 0         | 48.7   |
| 28349A>T     | S26C             | 1               | 0        | 0         | 0          | 0         | 1        | 0         | 51.0   |
| 28349A>G     | S26G             | 1               | 1        | 0         | 0          | 0         | 0        | 0         | 54.6   |
| 28344C>A     | T24N             | 28              | 0        | 0         | 10         | 0         | 0        | 18        | 48.7   |
| 28354C>T     | N27N             | 3               | 0        | 0         | 0          | 3         | 0        | 0         | 47.7   |
| 28344C>T     | T24I             | 4               | 0        | 3         | 1          | 0         | 0        | 0         | 48.7   |

Table S25: Frequencies of single SNP genotypes in the E-Sarbeco-F1

| SNP position | Protein mutation | Total frequency | ClusterI | ClusterII | ClusterIII | ClusterIV | ClusterV | ClusterVI | Tm(°C) |
|--------------|------------------|-----------------|----------|-----------|------------|-----------|----------|-----------|--------|
| 26294T>C     | V17A             | 1               | 0        | 0         | 0          | 0         | 0        | 1         | 58.1   |
| 26286T>C     | V14V             | 2               | 0        | 0         | 0          | 1         | 0        | 1         | 59.0   |
| 26291G>A     | S16N             | 1               | 0        | 0         | 1          | 0         | 0        | 0         | 55.6   |
| 26270C>T     | T9I              | 17              | 0        | 0         | 9          | 6         | 2        | 0         | 54.6   |
| 26272G>T     | G10C             | 2               | 0        | 0         | 0          | 2         | 0        | 0         | 55.4   |

Table S26: Frequencies of single SNP genotypes in the E-Sarbeco-R2

| SNP position | Protein mutation | Total frequency | ClusterI | ClusterII | ClusterIII | ClusterIV | ClusterV | ClusterVI | Tm(°C) |
|--------------|------------------|-----------------|----------|-----------|------------|-----------|----------|-----------|--------|
| 26372G>T     | C43F             | 2               | 0        | 0         | 1          | 0         | 1        | 0         | 58.0   |
| 26370C>T     | Y42Y             | 6               | 0        | 4         | 1          | 1         | 0        | 0         | 58.3   |
| 26365G>T     | A41S             | 6               | 0        | 1         | 0          | 0         | 5        | 0         | 58.0   |
| 26366C>T     | A41V             | 4               | 0        | 1         | 3          | 0         | 0        | 0         | 57.7   |

Table S27: Frequencies of single SNP genotypes in the E-Sarbeco-P1

| SNP position | Protein mutation | Total frequency | ClusterI | ClusterII | ClusterIII | ClusterIV | ClusterV | ClusterVI | Tm(°C) |
|--------------|------------------|-----------------|----------|-----------|------------|-----------|----------|-----------|--------|
| 26353C>T     | L37F             | 2               | 0        | 2         | 0          | 0         | 0        | 0         | 64.5   |
| 26332A>G     | T30A             | 1               | 0        | 0         | 1          | 0         | 0        | 0         | 67.0   |
| 26340C>T     | A32A             | 26              | 0        | 23        | 0          | 0         | 3        | 0         | 63.4   |
| 26351C>T     | A36V             | 3               | 0        | 1         | 0          | 2         | 0        | 0         | 64.0   |
| 26352G>T     | A36A             | 1               | 0        | 0         | 0          | 1         | 0        | 0         | 63.8   |
| 26353C>A     | L37I             | 1               | 0        | 0         | 0          | 1         | 0        | 0         | 64.1   |
| 26354T>C     | L37P             | 1               | 0        | 0         | 0          | 1         | 0        | 0         | 67.7   |
| 26356C>G     | R38G             | 1               | 0        | 0         | 0          | 1         | 0        | 0         | 66.1   |
| 26333C>T     | T30I             | 12              | 1        | 3         | 5          | 3         | 0        | 0         | 63.6   |

Table S28: Frequencies of single SNP genotypes in the nCoV-IP2-12669Fw

| SNP position | Protein mutation | Total frequency | ClusterI | ClusterII | ClusterIII | ClusterIV | ClusterV | ClusterVI | Tm(°C) |
|--------------|------------------|-----------------|----------|-----------|------------|-----------|----------|-----------|--------|
| 12691T>C     | N2N              | 1               | 0        | 0         | 0          | 0         | 0        | 1         | 53.4   |
| 12694G>A     | E3E              | 1               | 0        | 0         | 1          | 0         | 0        | 0         | 48.2   |
| 12695C>T     | L4F              | 2               | 0        | 1         | 0          | 1         | 0        | 0         | 48.2   |

Table S29: Frequencies of single SNP genotypes in the nCoV-IP2-12759Rv

| SNP position | Protein mutation | Total frequency | ClusterI | ClusterII | ClusterIII | ClusterIV | ClusterV | ClusterVI | Tm(°C) |
|--------------|------------------|-----------------|----------|-----------|------------|-----------|----------|-----------|--------|
| 12795G>A     | G37E             | 1               | 0        | 0         | 0          | 1         | 0        | 0         | 50.4   |
| 12797G>A     | G38S             | 3               | 0        | 3         | 0          | 0         | 0        | 0         | 52.2   |
| 12787A>G     | T34T             | 4               | 0        | 4         | 0          | 0         | 0        | 0         | 55.0   |
| 12793G>A     | K36K             | 1               | 0        | 1         | 0          | 0         | 0        | 0         | 50.4   |
| 12790A>G     | T35T             | 22              | 0        | 0         | 0          | 5         | 17       | 0         | 55.0   |
| 12796A>C     | G37G             | 6               | 0        | 6         | 0          | 0         | 0        | 0         | 56.1   |
| 12788A>G     | T35A             | 1               | 0        | 0         | 0          | 1         | 0        | 0         | 54.8   |
| 12784C>T     | N33N             | 1               | 0        | 0         | 0          | 0         | 1        | 0         | 49.1   |
| 12793G>T     | K36N             | 5               | 1        | 1         | 0          | 2         | 1        | 0         | 50.3   |
| 12792A>G     | K36R             | 2               | 0        | 0         | 2          | 0         | 0        | 0         | 55.0   |
| 12781C>T     | Y32Y             | 37              | 13       | 12        | 3          | 8         | 1        | 0         | 49.1   |

Table S30: Frequencies of single SNP genotypes in the nCoV-IP2-12696bProbe(+)

| SNP position | Protein mutation | Total frequency | ClusterI | ClusterII | ClusterIII | ClusterIV | ClusterV | ClusterVI | Tm(°C) |
|--------------|------------------|-----------------|----------|-----------|------------|-----------|----------|-----------|--------|
| 12722T>C     | S13P             | 4               | 1        | 0         | 0          | 1         | 2        | 0         | 65.0   |
| 12730T>G     | A15A             | 1               | 1        | 0         | 0          | 0         | 0        | 0         | 65.1   |
| 12719A>G     | M12V             | 1               | 0        | 0         | 1          | 0         | 0        | 0         | 65.0   |
| 12729C>T     | A15V             | 4               | 0        | 1         | 0          | 3         | 0        | 0         | 60.7   |
| 12724T>G     | S13S             | 1               | 0        | 1         | 0          | 0         | 0        | 0         | 64.8   |
| 12733C>T     | A16A             | 2               | 0        | 0         | 0          | 2         | 0        | 0         | 59.8   |
| 12718G>A     | Q11Q             | 2               | 0        | 0         | 0          | 0         | 2        | 0         | 61.1   |
| 12731G>A     | A16T             | 2               | 0        | 2         | 0          | 0         | 0        | 0         | 59.5   |

Table S31: Frequencies of single SNP genotypes in the nCoV-IP4-14059Fw

| SNP position | Protein mutation | Total frequency | ClusterI | ClusterII | ClusterIII | ClusterIV | ClusterV | ClusterVI | Tm(°C) |
|--------------|------------------|-----------------|----------|-----------|------------|-----------|----------|-----------|--------|
| 14083A>G     | N215D            | 1               | 0        | 0         | 1          | 0         | 0        | 0         | 52.9   |
| 14091T>C     | Y217Y            | 1               | 0        | 0         | 1          | 0         | 0        | 0         | 53.0   |
| 14097C>T     | F219F            | 7               | 0        | 0         | 5          | 2         | 0        | 0         | 47.8   |

Table S32: Frequencies of single SNP genotypes in the nCoV-IP4-14146Rv

| SNP position | Protein mutation | Total frequency | ClusterI | ClusterII | ClusterIII | ClusterIV | ClusterV | ClusterVI | Tm(°C) |
|--------------|------------------|-----------------|----------|-----------|------------|-----------|----------|-----------|--------|
| 14177C>T     | T246I            | 1               | 1        | 0         | 0          | 0         | 0        | 0         | 46.0   |
| 14172A>G     | I244M            | 1               | 0        | 1         | 0          | 0         | 0        | 0         | 52.2   |
| 14186G>A     | R249K            | 1               | 0        | 0         | 0          | 1         | 0        | 0         | 48.4   |
| 14186G>T     | R249M            | 1               | 0        | 0         | 0          | 1         | 0        | 0         | 47.7   |
| 14185A>G     | R249G            | 1               | 0        | 0         | 0          | 1         | 0        | 0         | 51.9   |
| 14185A>T     | R249W            | 3               | 0        | 3         | 0          | 0         | 0        | 0         | 48.8   |
| 14175A>G     | L245L            | 1               | 0        | 0         | 0          | 0         | 0        | 1         | 51.6   |
| 14183C>T     | T248I            | 9               | 4        | 2         | 0          | 2         | 0        | 1         | 46.0   |
| 14179T>A     | L247M            | 1               | 0        | 0         | 1          | 0         | 0        | 0         | 48.7   |
| 14184C>A     | T248T            | 3               | 0        | 0         | 3          | 0         | 0        | 0         | 46.7   |
| 14178C>T     | T246T            | 16              | 2        | 1         | 5          | 4         | 1        | 3         | 46.7   |

Table S33: Frequencies of single SNP genotypes in the nCoV-IP4-14084Probe(+)

| SNP position | Protein mutation | Total frequency | ClusterI | ClusterII | ClusterIII | ClusterIV | ClusterV | ClusterVI | Tm(°C) |
|--------------|------------------|-----------------|----------|-----------|------------|-----------|----------|-----------|--------|
| 14109A>G     | I223M            | 1               | 0        | 1         | 0          | 0         | 0        | 0         | 60.5   |
| 14121A>G     | P227P            | 1               | 0        | 0         | 0          | 1         | 0        | 0         | 60.2   |
| 14118G>T     | T226T            | 1               | 1        | 0         | 0          | 0         | 0        | 0         | 53.9   |
| 14122G>T     | G228C            | 7               | 0        | 4         | 0          | 2         | 1        | 0         | 54.9   |
| 14117C>T     | T226M            | 2               | 2        | 0         | 0          | 0         | 0        | 0         | 54.4   |
| 14114C>T     | T225I            | 1               | 0        | 0         | 0          | 1         | 0        | 0         | 54.5   |
| 14119C>T     | P227S            | 3               | 0        | 1         | 1          | 0         | 1        | 0         | 54.5   |
| 14122G>A     | G228S            | 1               | 0        | 0         | 0          | 1         | 0        | 0         | 55.1   |
| 14120C>T     | P227L            | 25              | 0        | 0         | 5          | 13        | 3        | 4         | 53.8   |
| 14117C>A     | T226K            | 1               | 0        | 1         | 0          | 0         | 0        | 0         | 54.6   |
| 14118G>A     | T226T            | 6               | 0        | 5         | 0          | 1         | 0        | 0         | 54.4   |

Table S34: Frequencies of single SNP genotypes in the RdRP-SARSr-F2

| SNP position | Protein mutation | Total frequency | ClusterI | ClusterII | ClusterIII | ClusterIV | ClusterV | ClusterVI | Tm(°C) |
|--------------|------------------|-----------------|----------|-----------|------------|-----------|----------|-----------|--------|
| 15448G>A     | G670S            | 1               | 1        | 0         | 0          | 0         | 0        | 0         | 60.8   |
| 15450C>T     | G670G            | 3               | 0        | 0         | 0          | 3         | 0        | 0         | 61.5   |
| 15444G>T     | M668I            | 14              | 0        | 1         | 3          | 8         | 2        | 0         | 62.1   |
| 15451G>A     | G671S            | 9               | 0        | 0         | 1          | 4         | 4        | 0         | 61.2   |
| 15438G>T     | M666I            | 62              | 1        | 0         | 1          | 22        | 38       | 0         | 61.8   |

Table S35: Frequencies of single SNP genotypes in the RdRP-SARSr-R1

| SNP position | Protein mutation | Total frequency | ClusterI | ClusterII | ClusterIII | ClusterIV | ClusterV | ClusterVI | Tm(°C) |
|--------------|------------------|-----------------|----------|-----------|------------|-----------|----------|-----------|--------|
| 15523A>G     | N695D            | 1               | 1        | 0         | 0          | 0         | 0        | 0         | 54.1   |
| 15517G>A     | V693I            | 1               | 0        | 0         | 0          | 1         | 0        | 0         | 49.7   |
| 15519T>C     | V693V            | 2               | 1        | 0         | 0          | 1         | 0        | 0         | 53.1   |

Table S36: Frequencies of single SNP genotypes in the RdRP-SARSr-P2

| SNP position | Protein mutation | Total frequency | ClusterI | ClusterII | ClusterIII | ClusterIV | ClusterV | ClusterVI | Tm(°C) |
|--------------|------------------|-----------------|----------|-----------|------------|-----------|----------|-----------|--------|
| 15491A>G     | D684G            | 1               | 0        | 1         | 0          | 0         | 0        | 0         | 68.3   |
| 15480C>T     | T680T            | 5               | 0        | 3         | 0          | 2         | 0        | 0         | 64.2   |
| 15477A>G     | G679G            | 3               | 0        | 2         | 1          | 0         | 0        | 0         | 68.0   |
| 15474T>C     | G678G            | 1               | 0        | 0         | 1          | 0         | 0        | 0         | 68.1   |

Table S37: ORF1ab-China-F

| SNP position | Protein mutation | Total frequency | ClusterI | ClusterII | ClusterIII | ClusterIV | ClusterV | ClusterVI | Tm(°C) |
|--------------|------------------|-----------------|----------|-----------|------------|-----------|----------|-----------|--------|
| 13358C>T     | L112F            | 1               | 0        | 0         | 0          | 0         | 1        | 0         | 55.8   |
| 13345T>C     | P107P            | 1               | 0        | 1         | 0          | 0         | 0        | 0         | 60.4   |
| 13356C>T     | T111I            | 10              | 0        | 1         | 2          | 2         | 3        | 2         | 54.5   |
| 13348G>T     | V108V            | 7               | 0        | 2         | 0          | 4         | 1        | 0         | 55.6   |

Table S38: Frequencies of single SNP genotypes in the ORF1ab-China-R

| SNP position | Protein mutation | Total frequency | ClusterI | ClusterII | ClusterIII | ClusterIV | ClusterV | Tm(°C) |
|--------------|------------------|-----------------|----------|-----------|------------|-----------|----------|--------|
| /            | /                | /               | /        | /         | /          | /         | /        | /      |

Table S39: Frequencies of single SNP genotypes in the ORF1ab-China-P

| SNP position | Protein mutation | Total frequency | ClusterI | ClusterII | ClusterIII | ClusterIV | ClusterV | ClusterVI | Tm(°C) |
|--------------|------------------|-----------------|----------|-----------|------------|-----------|----------|-----------|--------|
| 13401A>T     | Y126F            | 1               | 0        | 1         | 0          | 0         | 0        | 0         | 68.1   |
| 13385G>A     | G121S            | 1               | 0        | 0         | 1          | 0         | 0        | 0         | 65.3   |
| 13381C>G     | V119V            | 1               | 0        | 0         | 0          | 0         | 1        | 0         | 67.5   |
| 13378C>T     | T118T            | 7               | 0        | 1         | 1          | 0         | 0        | 5         | 65.3   |
| 13402T>C     | Y126Y            | 1               | 1        | 0         | 0          | 0         | 0        | 0         | 69.1   |
| 13387T>C     | G121G            | 4               | 0        | 0         | 1          | 3         | 0        | 0         | 69.5   |
| 13389T>C     | M122T            | 2               | 0        | 0         | 2          | 0         | 0        | 0         | 69.1   |
| 13381C>T     | V119V            | 26              | 0        | 0         | 23         | 2         | 0        | 1         | 66.2   |
| 13379G>A     | V119I            | 4               | 0        | 2         | 0          | 2         | 0        | 0         | 65.5   |
| 13401A>G     | Y126C            | 1               | 0        | 0         | 0          | 1         | 0        | 0         | 69.5   |
| 13397G>A     | G125S            | 3               | 0        | 0         | 0          | 1         | 2        | 0         | 65.7   |
| 13384C>T     | C120C            | 8               | 0        | 2         | 1          | 1         | 0        | 4         | 65.5   |
| 13403G>A     | G127S            | 1               | 0        | 0         | 0          | 1         | 0        | 0         | 64.9   |
| 13381C>A     | V119V            | 1               | 0        | 0         | 1          | 0         | 0        | 0         | 65.3   |

Table S40: Frequencies of single SNP genotypes in the ORF1b-nsp14-HK-F

| SNP position | Protein mutation | Total frequency | ClusterI | ClusterII | ClusterIII | ClusterIV | ClusterV | ClusterVI | Tm(°C) |
|--------------|------------------|-----------------|----------|-----------|------------|-----------|----------|-----------|--------|
| 18794A>T     | N252I            | 1               | 0        | 0         | 0          | 1         | 0        | 0         | 55.1   |
| 18795C>T     | N252N            | 1               | 1        | 0         | 0          | 0         | 0        | 0         | 52.9   |
| 18796C>T     | L253L            | 2               | 0        | 1         | 0          | 1         | 0        | 0         | 53.5   |
| 18780G>T     | W247C            | 3               | 1        | 0         | 2          | 0         | 0        | 0         | 53.2   |
| 18792T>C     | G251G            | 3               | 0        | 0         | 3          | 0         | 0        | 0         | 58.9   |
| 18782G>T     | G248V            | 2               | 0        | 0         | 1          | 1         | 0        | 0         | 53.5   |

Table S41: Frequencies of single SNP genotypes in the ORF1b-nsp14-HK-R

| SNP position | Protein mutation | Total frequency | ClusterI | ClusterII | ClusterIII | ClusterIV | ClusterV | ClusterVI | Tm(°C) |
|--------------|------------------|-----------------|----------|-----------|------------|-----------|----------|-----------|--------|
| 18909T>C     | V290V            | 1               | 0        | 1         | 0          | 0         | 0        | 0         | 58.9   |
| 18890A>G     | E284G            | 1               | 0        | 0         | 0          | 0         | 1        | 0         | 60.7   |
| 18906T>C     | R289R            | 1               | 0        | 0         | 0          | 0         | 0        | 1         | 60.4   |
| 18902A>C     | K288T            | 1               | 0        | 0         | 1          | 0         | 0        | 0         | 60.4   |
| 18891G>A     | E284E            | 4               | 0        | 4         | 0          | 0         | 0        | 0         | 56.4   |
| 18907G>T     | V290F            | 17              | 0        | 4         | 11         | 1         | 0        | 1         | 56.5   |
| 18905G>A     | R289H            | 1               | 1        | 0         | 0          | 0         | 0        | 0         | 55.6   |
| 18898G>T     | V287F            | 46              | 2        | 0         | 40         | 1         | 0        | 3         | 56.5   |
| 18904C>T     | R289C            | 17              | 0        | 0         | 0          | 12        | 5        | 0         | 55.6   |

Table S42: Frequencies of single SNP genotypes in the ORF1b-nsp14-HK-P

| SNP position | Protein mutation | Total frequency | ClusterI | ClusterII | ClusterIII | ClusterIV | ClusterV | ClusterVI | Tm(°C) |
|--------------|------------------|-----------------|----------|-----------|------------|-----------|----------|-----------|--------|
| 18858T>C     | D273D            | 3               | 0        | 0         | 0          | 3         | 0        | 0         | 58.6   |
| 18861A>T     | A274A            | 2               | 0        | 0         | 2          | 0         | 0        | 0         | 55.2   |
| 18863T>C     | I275T            | 6               | 1        | 1         | 0          | 4         | 0        | 0         | 58.6   |
| 18867G>T     | M276I            | 1               | 0        | 0         | 0          | 1         | 0        | 0         | 54.1   |
| 18864C>T     | I275I            | 1               | 0        | 0         | 0          | 0         | 0        | 1         | 54.1   |
| 18859G>T     | A274S            | 24              | 1        | 0         | 7          | 5         | 0        | 11        | 54.3   |

Table S43: Frequencies of single SNP genotypes in the SC2-F

| SNP position | Protein mutation | Total frequency | ClusterI | ClusterII | ClusterIII | ClusterIV | ClusterV | ClusterVI | Tm(°C) |
|--------------|------------------|-----------------|----------|-----------|------------|-----------|----------|-----------|--------|
| 29482C>T     | F403F            | 1               | 0        | 1         | 0          | 0         | 0        | 0         | 57.5   |
| 29463C>T     | A397V            | 2               | 0        | 1         | 0          | 0         | 1        | 0         | 58.2   |
| 29470T>A     | D399E            | 1               | 0        | 0         | 0          | 1         | 0        | 0         | 58.7   |
| 29464T>A     | A397A            | 1               | 0        | 0         | 0          | 1         | 0        | 0         | 58.7   |
| 29467A>T     | A398A            | 4               | 0        | 2         | 1          | 0         | 0        | 1         | 58.7   |
| 29468G>T     | D399Y            | 4               | 0        | 1         | 0          | 1         | 1        | 1         | 56.2   |
| 29467A>C     | A398A            | 1               | 0        | 0         | 1          | 0         | 0        | 0         | 61.2   |
| 29464T>C     | A397A            | 4               | 0        | 0         | 2          | 0         | 0        | 2         | 61.2   |
| 29468G>A     | D399N            | 2               | 0        | 0         | 0          | 2         | 0        | 0         | 57.5   |
| 29468G>C     | D399H            | 1               | 0        | 0         | 1          | 0         | 0        | 0         | 59.0   |
| 29474G>T     | D401Y            | 67              | 0        | 0         | 29         | 24        | 11       | 3         | 56.1   |

Table S44: Frequencies of single SNP genotypes in the SC2-R

| SNP position | Protein mutation | Total frequency | ClusterI | ClusterII | ClusterIII | ClusterIV | ClusterV | ClusterVI | Tm(°C) |
|--------------|------------------|-----------------|----------|-----------|------------|-----------|----------|-----------|--------|
| /            | /                | /               | /        | /         | /          | /         | /        | /         | /      |

Table S45: Frequencies of single SNP genotypes in the NIIDWH-1F501

| SNP position | Protein mutation | Total frequency | ClusterI | ClusterII | ClusterIII | ClusterIV | ClusterV | ClusterVI | Tm(°C) |
|--------------|------------------|-----------------|----------|-----------|------------|-----------|----------|-----------|--------|
| 503C>T       | P80S             | 2               | 0        | 0         | 0          | 1         | 0        | 1         | 62.2   |
| 488G>A       | D75N             | 1               | 0        | 1         | 0          | 0         | 0        | 0         | 62.6   |
| 491G>A       | A76T             | 5               | 0        | 5         | 0          | 0         | 0        | 0         | 61.8   |
| 490T>C       | D75D             | 3               | 0        | 3         | 0          | 0         | 0        | 0         | 66.9   |
| 492C>T       | A76V             | 1               | 0        | 1         | 0          | 0         | 0        | 0         | 62.9   |
| 498C>T       | T78I             | 2               | 0        | 0         | 0          | 1         | 0        | 1         | 62.8   |
| 497A>G       | T78A             | 1               | 0        | 1         | 0          | 0         | 0        | 0         | 66.5   |
| 501C>T       | A79V             | 2               | 0        | 0         | 1          | 1         | 0        | 0         | 61.8   |
| 504C>T       | P80L             | 2               | 0        | 0         | 1          | 0         | 1        | 0         | 63.1   |
| 486C>T       | S74L             | 2               | 0        | 0         | 1          | 0         | 0        | 1         | 62.7   |
| 487G>A       | S74S             | 18              | 0        | 2         | 0          | 15        | 0        | 1         | 62.0   |
| 490T>A       | D75E             | 192             | 0        | 192       | 0          | 0         | 0        | 0         | 64.7   |
| 489A>G       | D75G             | 24              | 0        | 0         | 22         | 0         | 2        | 0         | 67.1   |

Table S46: Frequencies of single SNP genotypes in the NIIDWH-1R913

| SNP position | Protein mutation | Total frequency | ClusterI | ClusterII | ClusterIII | ClusterIV | ClusterV | ClusterVI | Tm(°C) |
|--------------|------------------|-----------------|----------|-----------|------------|-----------|----------|-----------|--------|
| 878C>A       | L25I             | 1               | 0        | 1         | 0          | 0         | 0        | 0         | 59.5   |
| 874C>A       | D23E             | 1               | 0        | 0         | 0          | 1         | 0        | 0         | 60.8   |
| 875C>T       | L24F             | 4               | 0        | 1         | 2          | 0         | 1        | 0         | 60.0   |
| 885G>T       | R27L             | 4               | 0        | 0         | 3          | 0         | 0        | 1         | 59.7   |
| 888C>T       | A28V             | 1               | 0        | 0         | 0          | 0         | 0        | 1         | 60.2   |
| 883A>C       | A26A             | 1               | 0        | 0         | 0          | 1         | 0        | 0         | 64.2   |
| 882C>T       | A26V             | 2               | 0        | 0         | 0          | 1         | 1        | 0         | 59.2   |
| 884C>A       | R27S             | 1               | 0        | 1         | 0          | 0         | 0        | 0         | 59.7   |
| 886T>C       | R27R             | 1               | 0        | 0         | 1          | 0         | 0        | 0         | 64.1   |
| 881G>A       | A26T             | 4               | 0        | 0         | 0          | 4         | 0        | 0         | 60.2   |
| 874C>T       | D23D             | 8               | 0        | 0         | 0          | 8         | 0        | 0         | 60.8   |
| 889T>C       | A28A             | 2               | 0        | 0         | 1          | 1         | 0        | 0         | 64.3   |
| 884C>T       | R27C             | 68              | 1        | 61        | 2          | 2         | 2        | 0         | 59.6   |
| 895A>G       | K30K             | 30              | 0        | 30        | 0          | 0         | 0        | 0         | 63.8   |

Table S47: Frequencies of single SNP genotypes in the NIIDWH-1F509

| SNP position | Protein mutation | Total frequency | ClusterI | ClusterII | ClusterIII | ClusterIV | ClusterV | ClusterVI | Tm(°C) |
|--------------|------------------|-----------------|----------|-----------|------------|-----------|----------|-----------|--------|
| 503C>T       | P80S             | 2               | 0        | 0         | 0          | 1         | 0        | 1         | 55.1   |
| 510G>A       | G82D             | 1               | 0        | 0         | 0          | 1         | 0        | 0         | 56.6   |
| 492C>T       | A76V             | 1               | 0        | 1         | 0          | 0         | 0        | 0         | 57.4   |
| 498C>T       | T78I             | 2               | 0        | 0         | 0          | 1         | 0        | 1         | 55.9   |
| 497A>G       | T78A             | 1               | 0        | 1         | 0          | 0         | 0        | 0         | 60.0   |
| 501C>T       | A79V             | 2               | 0        | 0         | 1          | 1         | 0        | 0         | 54.5   |
| 509G>A       | G82S             | 10              | 7        | 0         | 0          | 2         | 1        | 0         | 54.3   |
| 504C>T       | P80L             | 2               | 0        | 0         | 1          | 0         | 1        | 0         | 55.7   |
| 505T>C       | P80P             | 2               | 0        | 0         | 2          | 0         | 0        | 0         | 61.1   |
| 506C>T       | H81Y             | 7               | 0        | 3         | 3          | 0         | 1        | 0         | 55.1   |

Table S48: Frequencies of single SNP genotypes in the NIIDWH-1R854

| SNP position | Protein mutation | Total frequency | ClusterI | ClusterII | ClusterIII | ClusterIV | ClusterV | ClusterVI | Tm(°C) |
|--------------|------------------|-----------------|----------|-----------|------------|-----------|----------|-----------|--------|
| 818T>C       | Y5H              | 1               | 0        | 0         | 0          | 0         | 1        | 0         | 58.5   |
| 817C>T       | R4R              | 1               | 0        | 0         | 0          | 1         | 0        | 0         | 53.8   |
| 816G>A       | R4H              | 2               | 0        | 1         | 0          | 0         | 0        | 1         | 54.2   |
| 837G>T       | C11F             | 1               | 0        | 0         | 1          | 0         | 0        | 0         | 54.6   |
| 835C>T       | F10F             | 24              | 1        | 6         | 6          | 9         | 2        | 0         | 54.3   |
| 823C>T       | V6V              | 36              | 1        | 4         | 13         | 2         | 1        | 15        | 53.5   |
| 829C>T       | N8N              | 46              | 7        | 6         | 6          | 26        | 0        | 1         | 52.6   |
| 832C>T       | N9N              | 19              | 0        | 6         | 7          | 4         | 1        | 1         | 53.8   |
| 833T>C       | F10L             | 131             | 54       | 2         | 0          | 75        | 0        | 0         | 57.4   |



Table S49: Frequencies of single SNP genotypes in the NIIDWH-1SeqF519

| SNP position | Protein mutation | Total frequency | ClusterI | ClusterII | ClusterIII | ClusterIV | ClusterV | ClusterVI | Tm(°C) |
|--------------|------------------|-----------------|----------|-----------|------------|-----------|----------|-----------|--------|
| 518A>G       | M85V             | 1               | 0        | 0         | 0          | 1         | 0        | 0         | 57.0   |
| 503C>T       | P80S             | 2               | 0        | 0         | 0          | 1         | 0        | 1         | 50.9   |
| 510G>A       | G82D             | 1               | 0        | 0         | 0          | 1         | 0        | 0         | 50.9   |
| 512C>T       | H83Y             | 4               | 1        | 2         | 0          | 1         | 0        | 0         | 51.0   |
| 511T>C       | G82G             | 1               | 0        | 0         | 1          | 0         | 0        | 0         | 56.5   |
| 514T>G       | H83Q             | 1               | 0        | 0         | 1          | 0         | 0        | 0         | 56.0   |
| 515G>C       | V84L             | 1               | 0        | 0         | 1          | 0         | 0        | 0         | 53.2   |
| 516T>G       | V84G             | 1               | 0        | 0         | 1          | 0         | 0        | 0         | 55.9   |
| 517T>C       | V84V             | 1               | 0        | 0         | 1          | 0         | 0        | 0         | 56.4   |
| 519T>C       | M85T             | 1               | 0        | 0         | 1          | 0         | 0        | 0         | 56.5   |
| 520G>A       | M85I             | 1               | 0        | 0         | 1          | 0         | 0        | 0         | 50.2   |
| 521G>T       | V86F             | 2               | 0        | 1         | 0          | 0         | 0        | 1         | 52.4   |
| 509G>A       | G82S             | 10              | 7        | 0         | 0          | 2         | 1        | 0         | 50.2   |
| 520G>T       | M85I             | 5               | 0        | 0         | 1          | 4         | 0        | 0         | 51.5   |
| 504C>T       | P80L             | 2               | 0        | 0         | 1          | 0         | 1        | 0         | 51.5   |
| 505T>C       | P80P             | 2               | 0        | 0         | 2          | 0         | 0        | 0         | 56.7   |
| 514T>C       | H83H             | 83              | 0        | 83        | 0          | 0         | 0        | 0         | 56.5   |
| 513A>G       | H83R             | 4               | 0        | 0         | 3          | 1         | 0        | 0         | 56.5   |
| 506C>T       | H81Y             | 7               | 0        | 3         | 3          | 0         | 1        | 0         | 51.0   |

Table S50: Frequencies of single SNP genotypes in the NIIDWH-1SeqR840

| SNP position | Protein mutation | Total frequency | ClusterI | ClusterII | ClusterIII | ClusterIV | ClusterV | ClusterVI | Tm(°C) |
|--------------|------------------|-----------------|----------|-----------|------------|-----------|----------|-----------|--------|
| 818T>C       | Y5H              | 1               | 0        | 0         | 0          | 0         | 1        | 0         | 57.7   |
| 806G>A       | A1T              | 1               | 0        | 0         | 0          | 1         | 0        | 0         | 51.5   |
| 817C>T       | R4R              | 1               | 0        | 0         | 0          | 1         | 0        | 0         | 52.3   |
| 816G>A       | R4H              | 2               | 0        | 1         | 0          | 0         | 0        | 1         | 51.3   |
| 813C>A       | T3N              | 2               | 1        | 0         | 0          | 0         | 0        | 1         | 52.3   |
| 809T>A       | Y2N              | 6               | 3        | 0         | 0          | 3         | 0        | 0         | 55.6   |
| 810A>G       | Y2C              | 2               | 1        | 0         | 0          | 0         | 0        | 1         | 57.5   |
| 814T>C       | T3T              | 1               | 0        | 0         | 0          | 0         | 0        | 1         | 57.2   |
| 813C>T       | T3I              | 1               | 0        | 0         | 0          | 0         | 1        | 0         | 52.3   |
| 823C>T       | V6V              | 36              | 1        | 4         | 13         | 2         | 1        | 15        | 53.3   |
| 809T>C       | Y2H              | 3               | 0        | 1         | 1          | 1         | 0        | 0         | 57.5   |
| 815C>T       | R4C              | 10              | 0        | 3         | 7          | 0         | 0        | 0         | 52.0   |

Table S51: Frequencies of single SNP genotypes in the WuhanCoV-spk1-f

| SNP position | Protein mutation | Total frequency | ClusterI | ClusterII | ClusterIII | ClusterIV | ClusterV | ClusterVI | Tm(°C) |
|--------------|------------------|-----------------|----------|-----------|------------|-----------|----------|-----------|--------|
| 24364T>G     | I934M            | 1               | 0        | 1         | 0          | 0         | 0        | 0         | 60.0   |
| 24367A>C     | Q935H            | 1               | 0        | 0         | 0          | 0         | 1        | 0         | 60.2   |
| 24376T>C     | L938L            | 1               | 0        | 0         | 0          | 0         | 1        | 0         | 59.3   |
| 24367A>G     | Q935Q            | 2               | 0        | 1         | 0          | 0         | 1        | 0         | 59.9   |
| 24373A>G     | S937S            | 2               | 0        | 2         | 0          | 0         | 0        | 0         | 60.3   |
| 24376T>G     | L938L            | 1               | 0        | 0         | 1          | 0         | 0        | 0         | 59.6   |
| 24374C>T     | L938F            | 6               | 0        | 0         | 0          | 2         | 3        | 1         | 56.6   |
| 24372C>T     | S937L            | 3               | 0        | 0         | 1          | 2         | 0        | 0         | 56.0   |
| 24370C>A     | D936E            | 1               | 0        | 1         | 0          | 0         | 0        | 0         | 56.6   |
| 24370C>T     | D936D            | 10              | 1        | 6         | 2          | 0         | 0        | 1         | 56.6   |
| 24358C>A     | G932G            | 8               | 0        | 7         | 0          | 1         | 0        | 0         | 56.2   |
| 24374C>A     | L938I            | 1               | 0        | 0         | 1          | 0         | 0        | 0         | 56.6   |
| 24368G>T     | D936Y            | 393             | 264      | 3         | 4          | 118       | 2        | 2         | 55.9   |
| 24368G>C     | D936H            | 3               | 0        | 1         | 2          | 0         | 0        | 0         | 58.5   |

Table S52: Frequencies of single SNP genotypes in the WuhanCoV-spk1-r

| SNP position | Protein mutation | Total frequency | ClusterI | ClusterII | ClusterIII | ClusterIV | ClusterV | ClusterVI | Tm(°C) |
|--------------|------------------|-----------------|----------|-----------|------------|-----------|----------|-----------|--------|
| 24896C>T     | P1112S           | 2               | 0        | 0         | 0          | 0         | 2        | 0         | 55.1   |
| 24877A>G     | T1105T           | 2               | 0        | 2         | 0          | 0         | 0        | 0         | 59.3   |
| 24887T>C     | F1109L           | 3               | 0        | 0         | 2          | 0         | 0        | 1         | 58.3   |
| 24897C>T     | P1112L           | 3               | 0        | 0         | 1          | 1         | 0        | 1         | 54.5   |

Table S53: Frequencies of single SNP genotypes in the NIIDWH-1F24381

| SNP position | Protein mutation | Total frequency | ClusterI | ClusterII | ClusterIII | ClusterIV | ClusterV | ClusterVI | Tm(°C) |
|--------------|------------------|-----------------|----------|-----------|------------|-----------|----------|-----------|--------|
| 24380T>A     | S940T            | 1               | 0        | 0         | 1          | 0         | 0        | 0         | 56.6   |
| 24383A>G     | T941A            | 1               | 0        | 0         | 1          | 0         | 0        | 0         | 60.0   |
| 24364T>G     | I934M            | 1               | 0        | 1         | 0          | 0         | 0        | 0         | 58.7   |
| 24367A>C     | Q935H            | 1               | 0        | 0         | 0          | 0         | 1        | 0         | 59.9   |
| 24376T>C     | L938L            | 1               | 0        | 0         | 0          | 0         | 1        | 0         | 58.8   |
| 24367A>G     | Q935Q            | 2               | 0        | 1         | 0          | 0         | 1        | 0         | 59.5   |
| 24382C>G     | S940S            | 1               | 0        | 1         | 0          | 0         | 0        | 0         | 57.5   |
| 24378C>A     | S939Y            | 1               | 0        | 0         | 1          | 0         | 0        | 0         | 54.8   |
| 24373A>G     | S937S            | 2               | 0        | 2         | 0          | 0         | 0        | 0         | 60.0   |
| 24376T>G     | L938L            | 1               | 0        | 0         | 1          | 0         | 0        | 0         | 59.2   |
| 24374C>T     | L938F            | 6               | 0        | 0         | 0          | 2         | 3        | 1         | 55.6   |
| 24372C>T     | S937L            | 3               | 0        | 0         | 1          | 2         | 0        | 0         | 54.9   |
| 24370C>A     | D936E            | 1               | 0        | 1         | 0          | 0         | 0        | 0         | 55.6   |
| 24381C>T     | S940F            | 10              | 0        | 5         | 0          | 2         | 2        | 1         | 55.4   |
| 24370C>T     | D936D            | 10              | 1        | 6         | 2          | 0         | 0        | 1         | 55.6   |
| 24378C>T     | S939F            | 24              | 6        | 5         | 2          | 7         | 3        | 1         | 56.1   |
| 24374C>A     | L938I            | 1               | 0        | 0         | 1          | 0         | 0        | 0         | 55.6   |
| 24368G>T     | D936Y            | 393             | 264      | 3         | 4          | 118       | 2        | 2         | 54.8   |
| 24368G>C     | D936H            | 3               | 0        | 1         | 2          | 0         | 0        | 0         | 57.8   |
| 24382C>T     | S940S            | 31              | 4        | 4         | 0          | 22        | 0        | 1         | 54.2   |

Table S54: Frequencies of single SNP genotypes in the NIIDWH-1R24873

| SNP position | Protein mutation | Total frequency | ClusterI | ClusterII | ClusterIII | ClusterIV | ClusterV | ClusterVI | Tm(°C) |
|--------------|------------------|-----------------|----------|-----------|------------|-----------|----------|-----------|--------|
| 24842G>A     | V1094I           | 3               | 0        | 3         | 0          | 0         | 0        | 0         | 54.1   |
| 24834G>A     | R1091H           | 2               | 0        | 0         | 2          | 0         | 0        | 0         | 55.6   |
| 24834G>T     | R1091L           | 4               | 1        | 1         | 0          | 2         | 0        | 0         | 56.2   |
| 24856T>C     | N1098N           | 1               | 0        | 0         | 0          | 1         | 0        | 0         | 58.1   |
| 24844C>T     | V1094V           | 5               | 0        | 0         | 1          | 4         | 0        | 0         | 55.8   |

Table S55: Frequencies of single SNP genotypes in the NIIDWH-1SeqF24383

| SNP position | Protein mutation | Total frequency | ClusterI | ClusterII | ClusterIII | ClusterIV | ClusterV | ClusterVI | Tm(°C) |
|--------------|------------------|-----------------|----------|-----------|------------|-----------|----------|-----------|--------|
| 24380T>A     | S940T            | 1               | 0        | 0         | 1          | 0         | 0        | 0         | 56.2   |
| 24383A>G     | T941A            | 1               | 0        | 0         | 1          | 0         | 0        | 0         | 59.6   |
| 24367A>C     | Q935H            | 1               | 0        | 0         | 0          | 0         | 1        | 0         | 59.5   |
| 24376T>C     | L938L            | 1               | 0        | 0         | 0          | 0         | 1        | 0         | 58.4   |
| 24367A>G     | Q935Q            | 2               | 0        | 1         | 0          | 0         | 1        | 0         | 59.1   |
| 24382C>G     | S940S            | 1               | 0        | 1         | 0          | 0         | 0        | 0         | 57.1   |
| 24378C>A     | S939Y            | 1               | 0        | 0         | 1          | 0         | 0        | 0         | 54.4   |
| 24373A>G     | S937S            | 2               | 0        | 2         | 0          | 0         | 0        | 0         | 59.6   |
| 24376T>G     | L938L            | 1               | 0        | 0         | 1          | 0         | 0        | 0         | 58.8   |
| 24374C>T     | L938F            | 6               | 0        | 0         | 0          | 2         | 3        | 1         | 55.2   |
| 24386G>T     | A942S            | 7               | 0        | 1         | 6          | 0         | 0        | 0         | 56.0   |
| 24372C>T     | S937L            | 3               | 0        | 0         | 1          | 2         | 0        | 0         | 54.5   |
| 24370C>A     | D936E            | 1               | 0        | 1         | 0          | 0         | 0        | 0         | 55.2   |
| 24381C>T     | S940F            | 10              | 0        | 5         | 0          | 2         | 2        | 1         | 55.0   |
| 24370C>T     | D936D            | 10              | 1        | 6         | 2          | 0         | 0        | 1         | 55.2   |
| 24378C>T     | S939F            | 24              | 6        | 5         | 2          | 7         | 3        | 1         | 55.8   |
| 24374C>A     | L938I            | 1               | 0        | 0         | 1          | 0         | 0        | 0         | 55.2   |
| 24385A>G     | T941T            | 3               | 0        | 0         | 0          | 0         | 0        | 3         | 59.8   |
| 24368G>T     | D936Y            | 393             | 264      | 3         | 4          | 118       | 2        | 2         | 54.4   |
| 24368G>C     | D936H            | 3               | 0        | 1         | 2          | 0         | 0        | 0         | 57.5   |
| 24382C>T     | S940S            | 31              | 4        | 4         | 0          | 22        | 0        | 1         | 53.8   |

Table S56: Frequencies of single SNP genotypes in the NIIDWH-1SeqR24865

| SNP position | Protein mutation | Total frequency | ClusterI | ClusterII | ClusterIII | ClusterIV | ClusterV | ClusterVI | Tm(°C) |
|--------------|------------------|-----------------|----------|-----------|------------|-----------|----------|-----------|--------|
| 24832T>C     | P1090P           | 1               | 1        | 0         | 0          | 0         | 0        | 0         | 59.1   |
| 24842G>A     | V1094I           | 3               | 0        | 3         | 0          | 0         | 0        | 0         | 52.6   |
| 24834G>A     | R1091H           | 2               | 0        | 0         | 2          | 0         | 0        | 0         | 53.1   |
| 24833C>T     | R1091C           | 2               | 0        | 0         | 2          | 0         | 0        | 0         | 53.7   |
| 24834G>T     | R1091L           | 4               | 1        | 1         | 0          | 2         | 0        | 0         | 53.2   |
| 24844C>T     | V1094V           | 5               | 0        | 0         | 1          | 4         | 0        | 0         | 54.6   |

## S2 Additional supporting material

Total 7 spreadsheets are merged in the Supporting\_Tables.xlsx.

S57: Acknowledgement table provided by GISAID in Jan 2020.

S58: Acknowledgement table provided by GISAID in Feb 2020.

- S69: Acknowledgement table provided by GISAID in March 2020.
- S60: Acknowledgement table provided by GISAID in April 2020.
- S61: Acknowledgement table provided by GISAID in May 2020.
- S62: Acknowledgement table provided by GISAID in June 2020.
- S63: Acknowledgement table provided by GISAID in July 2020.

## References

- [1] A. K. Nalla, A. M. Casto, M.-L. W. Huang, G. A. Perchetti, R. Sampoleo, L. Shrestha, Y. Wei, H. Zhu, K. R. Jerome, and A. L. Greninger. Comparative performance of SARS-CoV-2 detection assays using seven different primer/probe sets and one assay kit. *Journal of Clinical Microbiology*, 2020.
- [2] B. Udugama, P. Kadhiresan, H. N. Kozlowski, A. Malekjahani, M. Osborne, V. Y. Li, H. Chen, S. Mubareka, J. Gubbay, and W. C. Chan. Diagnosing COVID-19: The disease and tools for detection. *ACS nano*, 2020.
- [3] V. M. Corman, O. Landt, M. Kaiser, R. Molenkamp, A. Meijer, D. K. Chu, T. Bleicker, S. Brünink, J. Schneider, M. L. Schmidt, et al. Detection of 2019 novel coronavirus (2019-nCoV) by real-time RT-PCR. *Eurosurveillance*, 25(3):2000045, 2020.
- [4] Kazuya Shirato, Naganori Nao, Harutaka Katano, Ikuyo Takayama, Shinji Saito, Fumihiro Kato, Hiroshi Katoh, Masafumi Sakata, Yuichiro Nakatsu, Yoshio Mori, et al. Development of genetic diagnostic methods for novel coronavirus 2019 (nCoV-2019) in Japan. *Japanese journal of infectious diseases*, pages JJID-2020, 2020.
